# Supplementary material
Source: Springer Nature journal article supplement (https://www.springermedizin.de/resource/supplementary/12903_2006_37_MOESM1_ESM.pdf/9517182)

■ mucosities    ▣ no mucosities

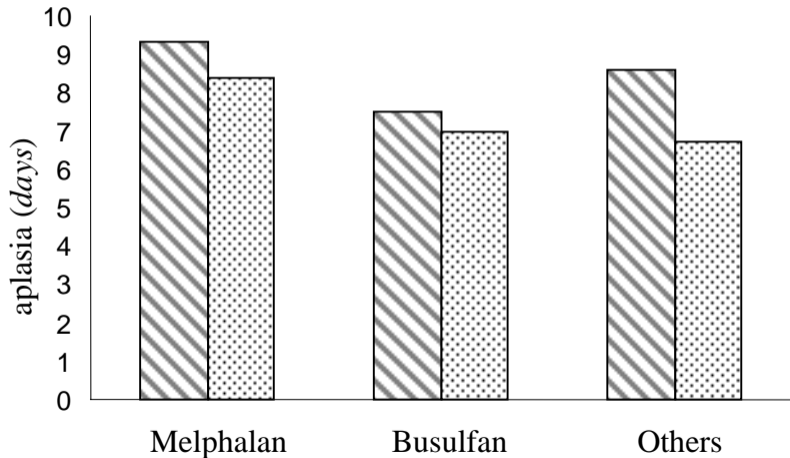

Supplement: MOESM1 [file 9517182]
